# Supplementary material for: Simulations of winter ozone in the Upper Green River Basin, Wyoming, using WRF-Chem
Source: Copernicus journal article supplement (doi:10.5194/acp-2022-456), 2022-08-10
Supplement: Supplementary file [file acp-2022-456-AC2-supplement.pdf]

We appreciate the comment from Dr. Seth Lyman, which motivated us to take a deeper look into VOCs and  $\text{NO}_X$  in the WRF-Chem simulations of the UGRB. Our response to his comment is provided below:

1. **Reviewer Comment:** On lines 383-384, does the Boulder station measure speciated NMHC, or just methane and total NMHC? If it measures only total NMHC, I wouldn't trust the magnitude of the measurement. TNMHC GCs tend to strongly overestimate the amount of NMHC in the air compared to speciated measurements of individual compounds, so a comparison with that measurement is not likely to be useful.

**Author Response:** Thank you for the insightful comment. Based on this comment and those from the other reviewers, we have included a sensitivity study in the revised manuscript focused on VOCs and  $\text{NO}_X$ . We have used WYDEQ data to adjust emissions of VOCs and  $\text{NO}_X$  and compared the  $\text{O}_3$  production. The result is that the basin appears to be highly constrained to the availability of  $\text{NO}_X$ .
